# Supplementary material
Source: Springer Nature journal article supplement (https://www.springermedizin.de/resource/supplementary/12874_2008_301_MOESM3_ESM.pdf/9434194)

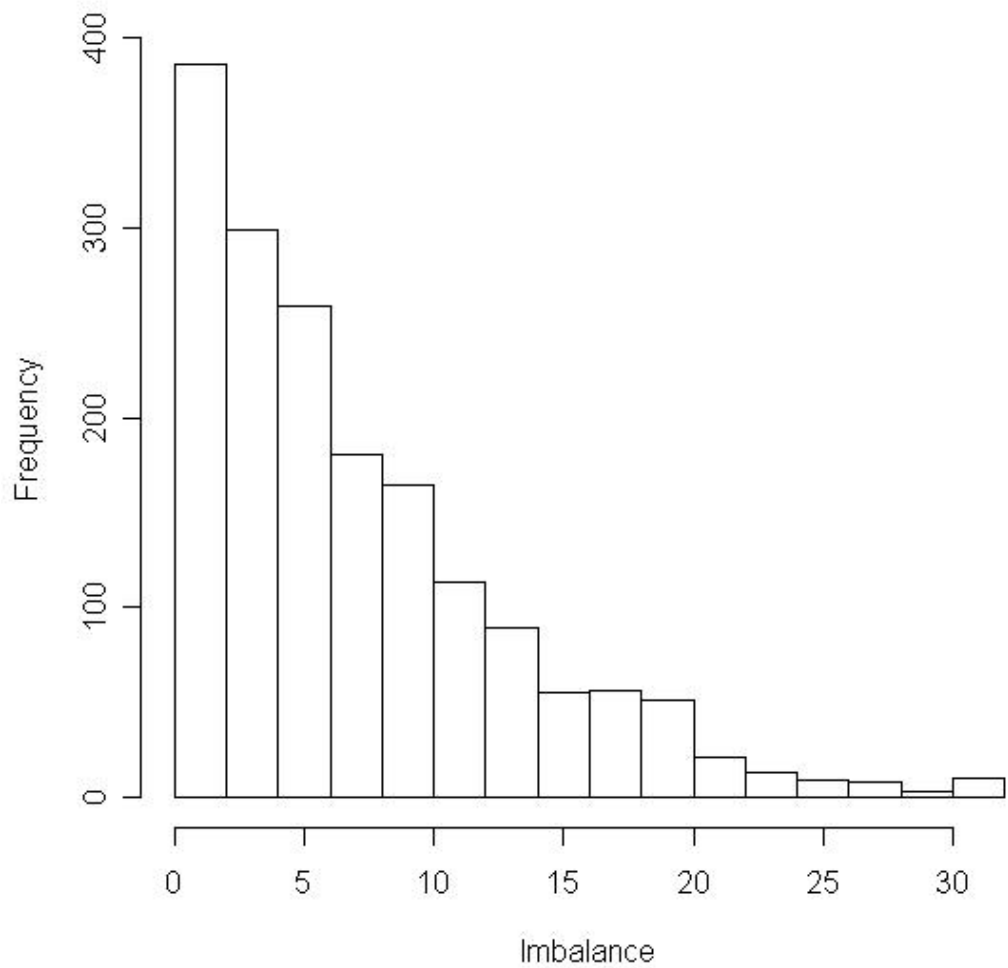

Supplement: MOESM3 [file 9434194]
